# Supplementary material
Source: MDPI journal article supplement (https://www.mdpi.com/2072-4292/13/8/1530)
Supplement: s1 [file s1 › remotesensing-1172010-supplementary.pdf]

## Supplementary Materials

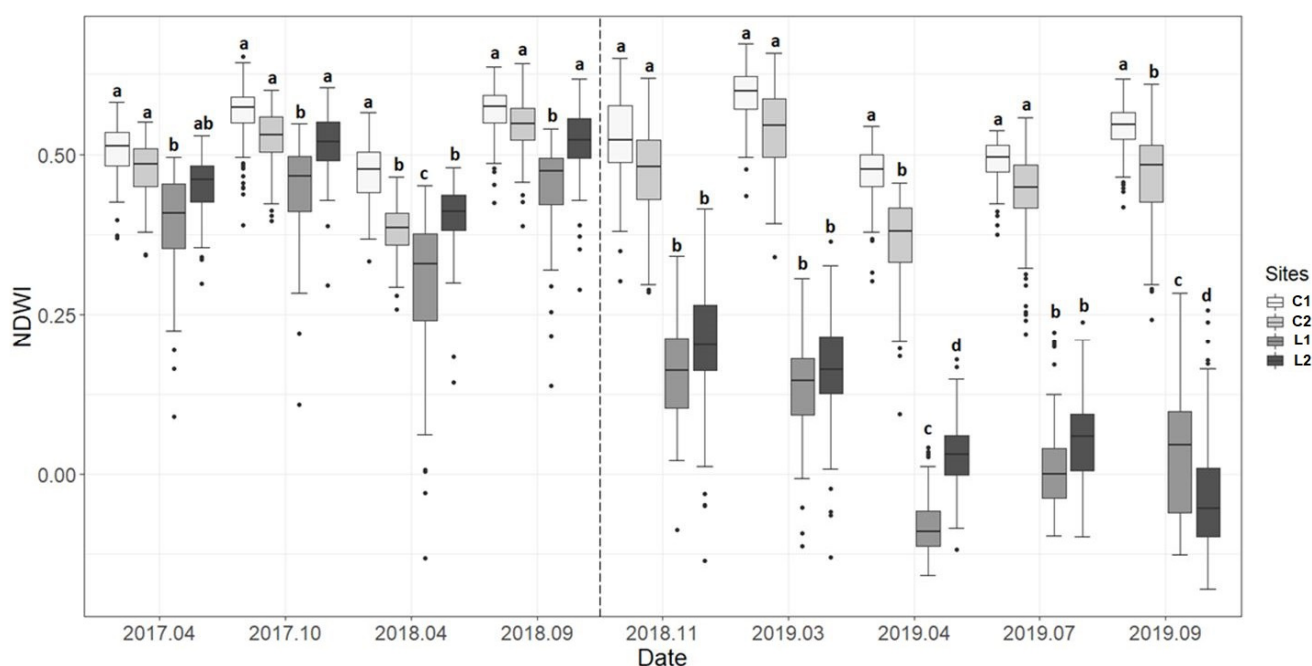

**Figure S1.** Median values, 25th and 75th percentiles of Normalized Difference Water Index (NDWI) temporal profiles for control (C1 and C2) and study sites (L1, L2) for each of the dates (April 2017, October 2017, April 2018, October 2018, November 2018, March 2019, April 2019, July 2019, September 2019). Letters denote statistical significance between control and wind-damaged sites index values ( $p$ -value  $< 0.05$ ). The dash line separates pre and post-Vaia dates.

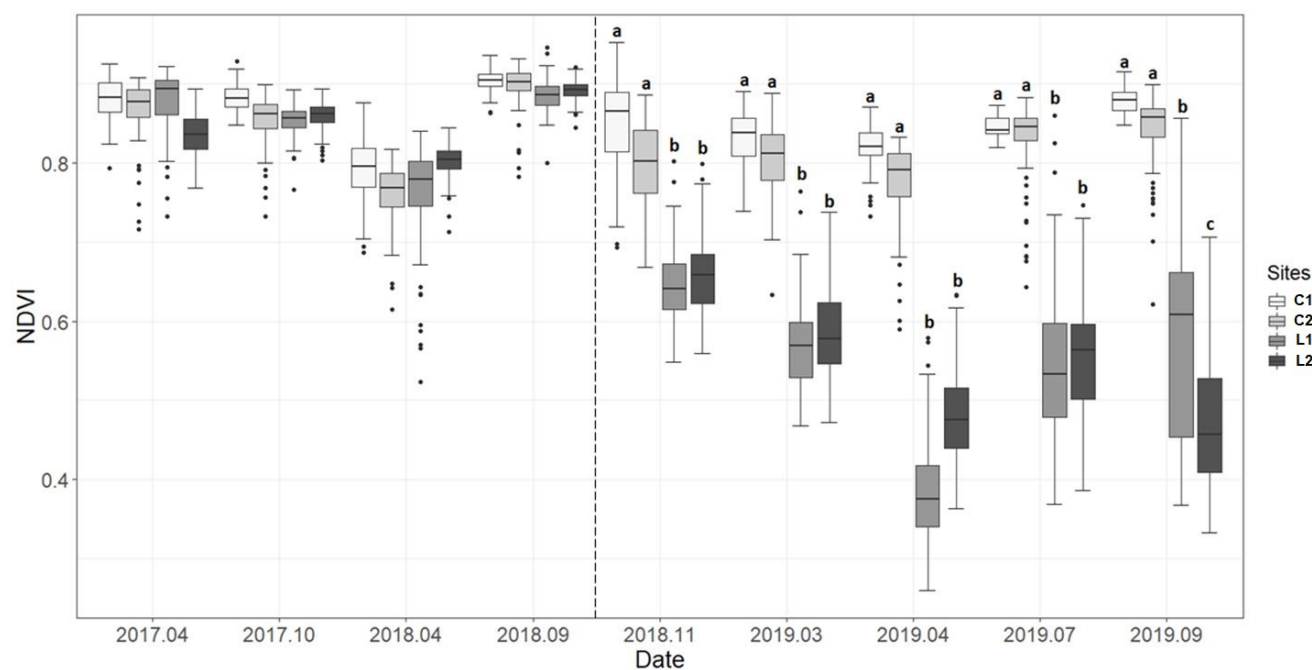

**Figure S2.** Median values, 25th and 75th percentiles of Normalized Difference Vegetation Index (NDVI) temporal profiles for control (C1 and C2) and study sites (L1, L2) for each of the dates (April 2017, October 2017, April 2018, October 2018, November 2018, March 2019, April 2019, July 2019, September 2019). Letters denote statistical significance between control and wind-damaged sites index values ( $p$ -value  $< 0.05$ ). The dash line separates pre and post-Vaia dates.

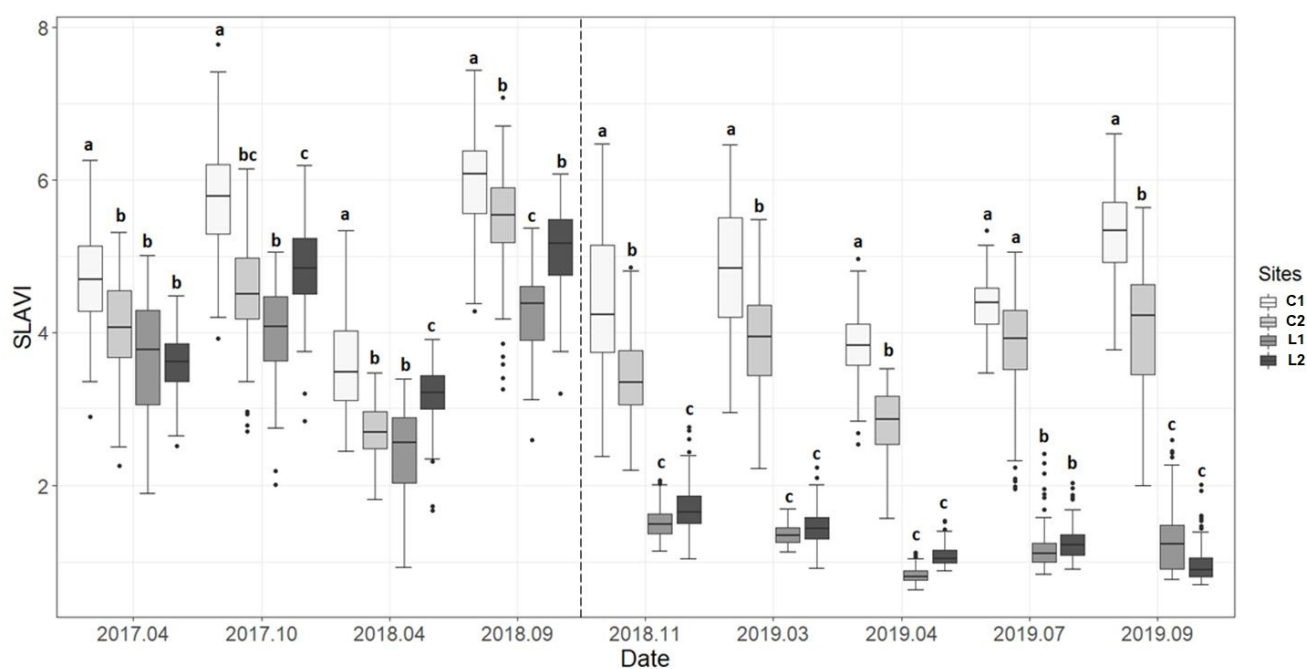

**Figure S3.** Median values, 25th and 75th percentiles of Specific Leaf Area Vegetation Index (SLAVI) temporal profiles for control (C1 and C2) and study sites (L1, L2) for each of the dates (April 2017, October 2017, April 2018, October 2018, November 2018, March 2019, April 2019, July 2019, September 2019). Letters denote statistical significance between control and wind-damaged sites index values ( $p$ -value  $< 0.05$ ). The dash line separates pre and post-Vaia dates.

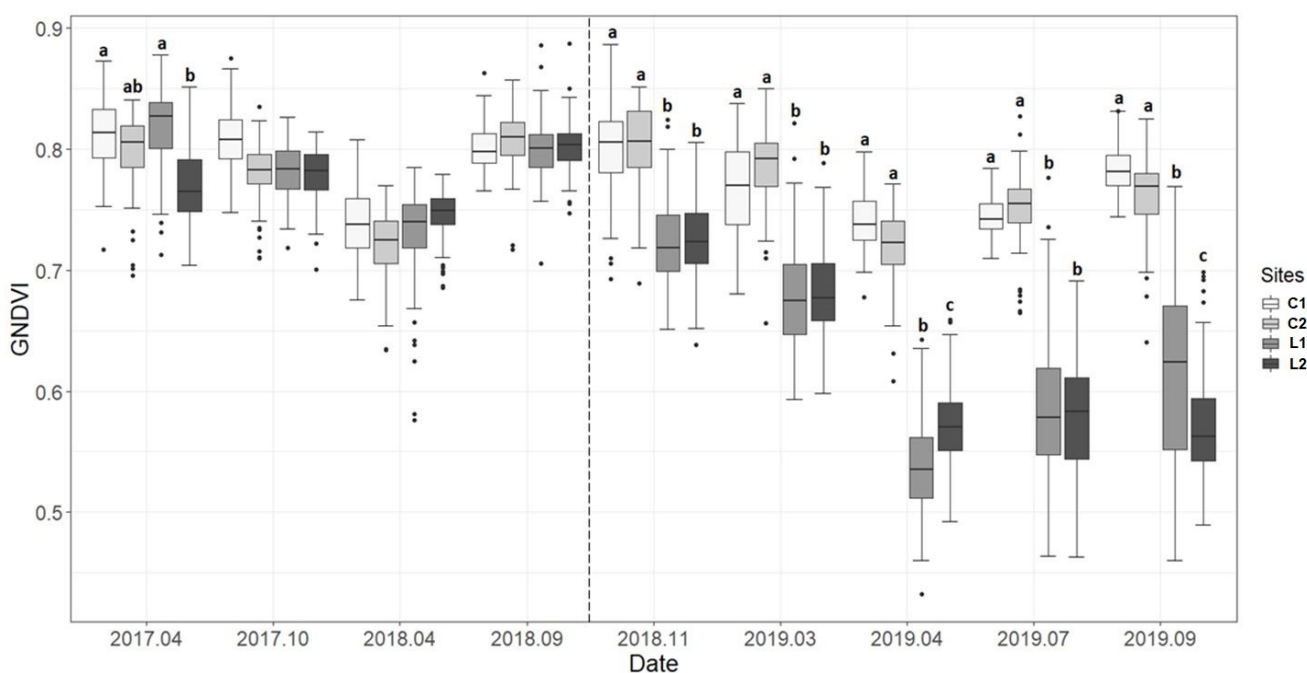

**Figure S4.** Median values, 25th and 75th percentiles of Green Normalized Difference Vegetation Index (GNDVI) temporal profiles for control (C1 and C2) and study sites (L1, L2) for each of the dates (April 2017, October 2017, April 2018, October 2018, November 2018, March 2019, April 2019, July 2019, September 2019). Letters denote statistical significance between control and wind-damaged sites index values ( $p$ -value  $< 0.05$ ). The dash line separates pre and post-Vaia dates.

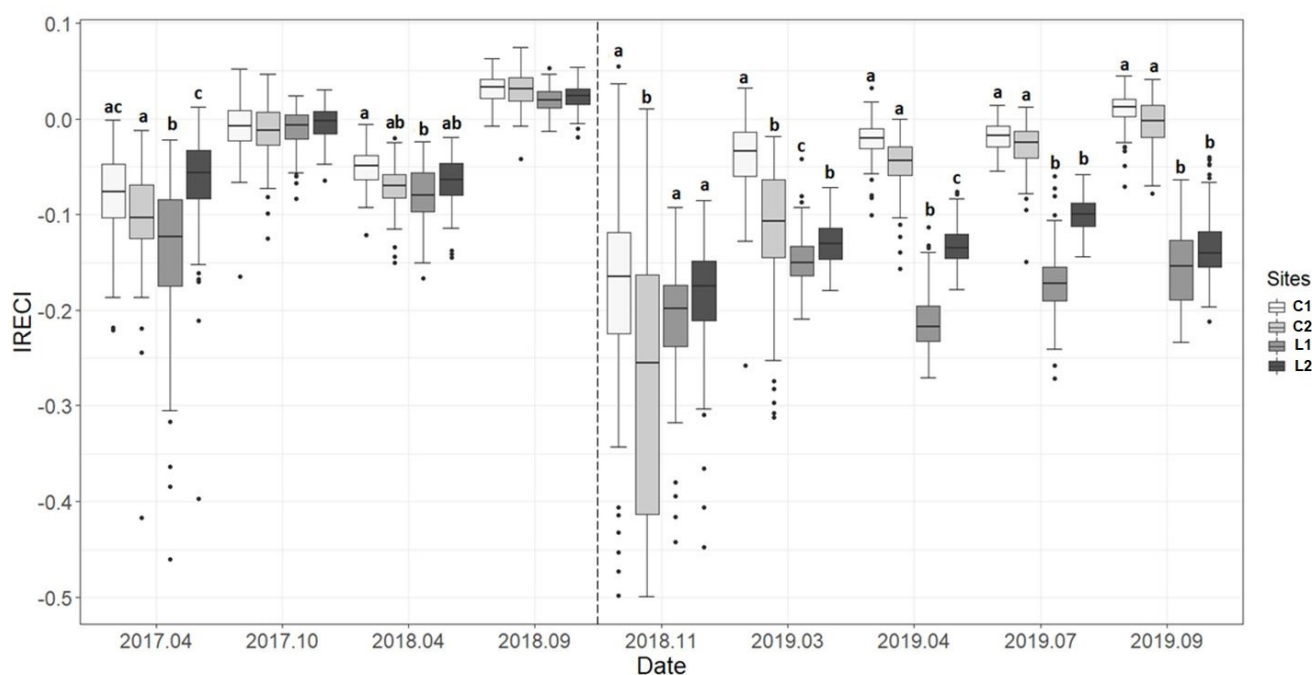

**Figure S5.** Median values, 25th and 75th percentiles of Inverted Red-Edge Chlorophyll Index (IRECI) temporal profiles for control (C1 and C2) and study sites (L1, L2) for each of the dates (April 2017, October 2017, April 2018, October 2018, November 2018, March 2019, April 2019, July 2019, September 2019). Letters denote statistical significance between control and wind-damaged sites index values (p-value < 0.05). The dash line separates pre and post-Vaia dates.

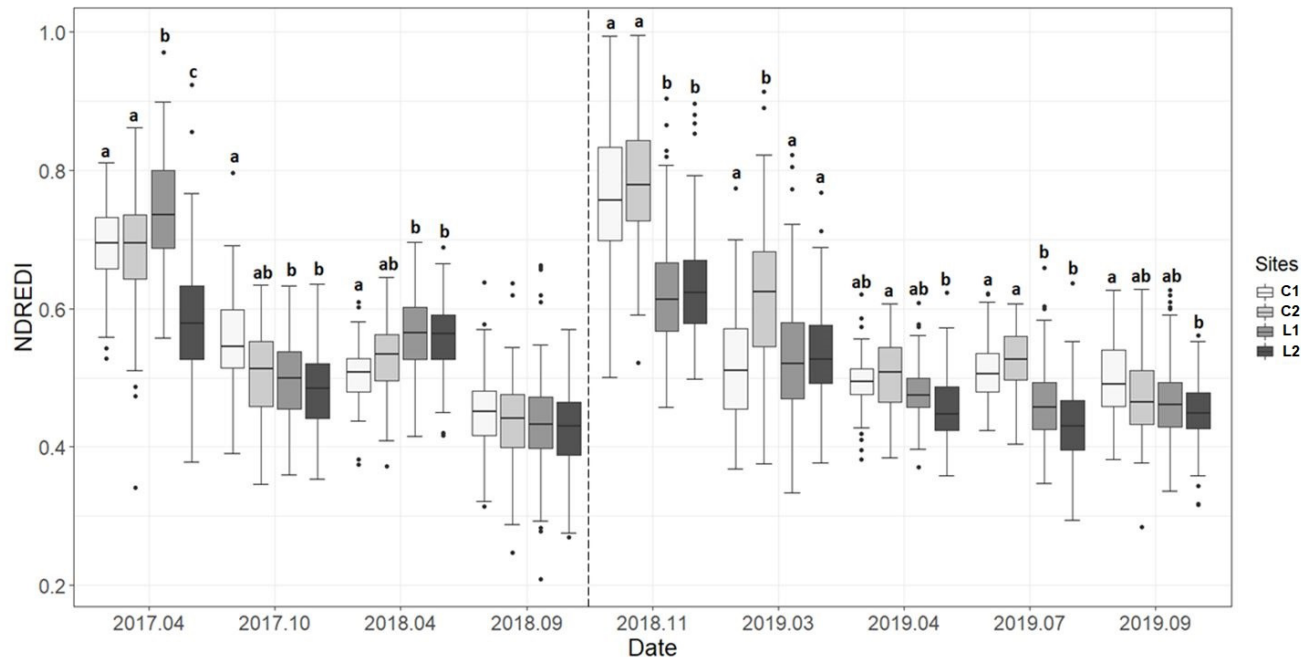

**Figure S6.** Median values, 25th and 75th percentiles of Normalized Difference Red-Edge Blue Index (NDREDI) temporal profiles for control (C1 and C2) and damaged study sites (L1, L2) for each of the dates (April 2017, October 2017, April 2018, October 2018, November 2018, March 2019, April 2019, July 2019, September 2019). Letters denote statistical significance between control and wind-damaged sites index values (p-value < 0.05). The dash line separates pre and post-Vaia dates.

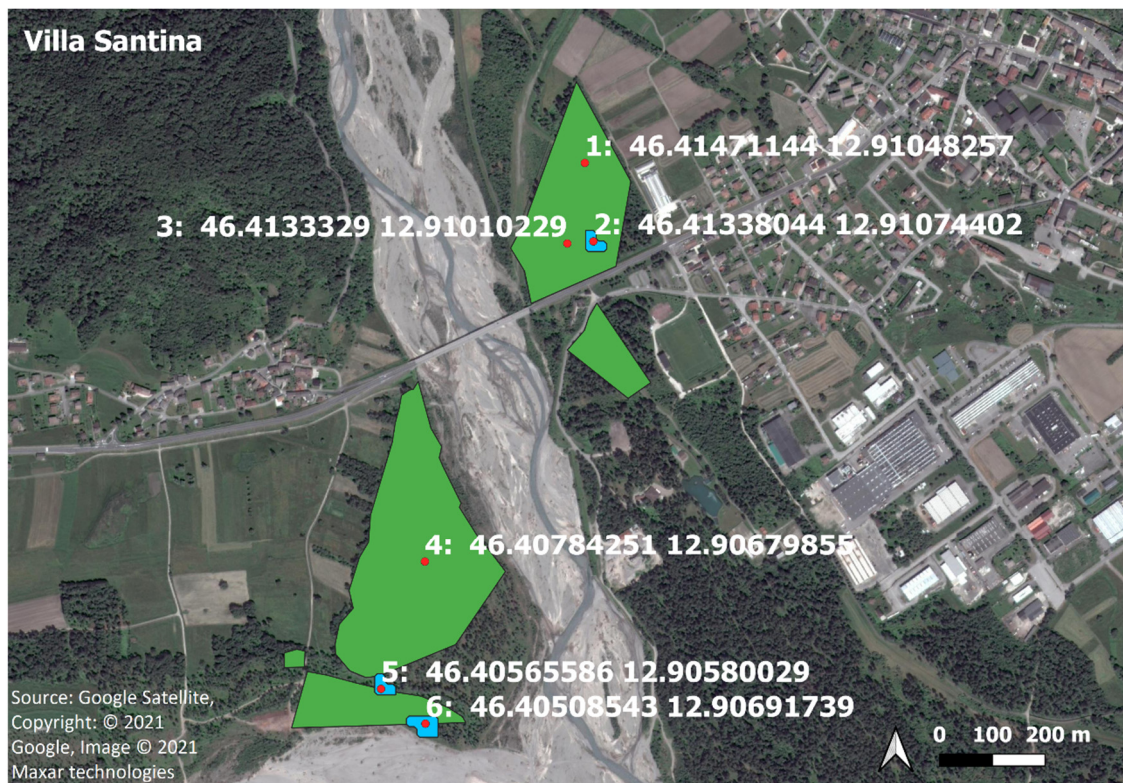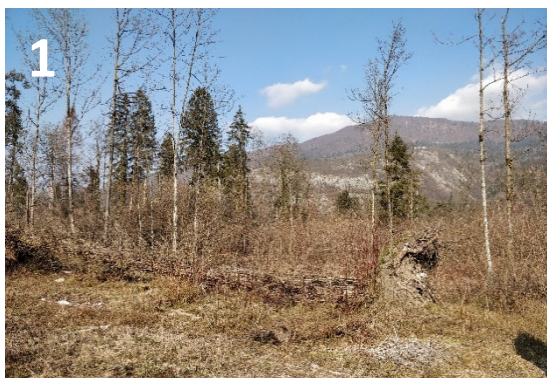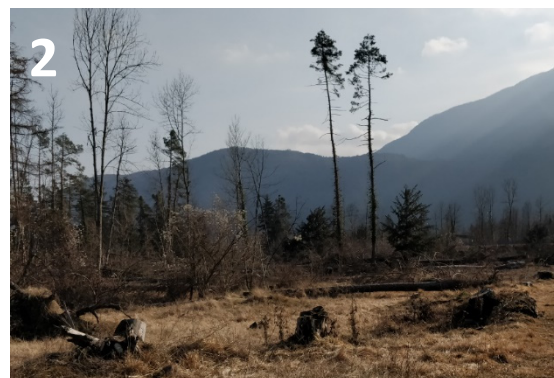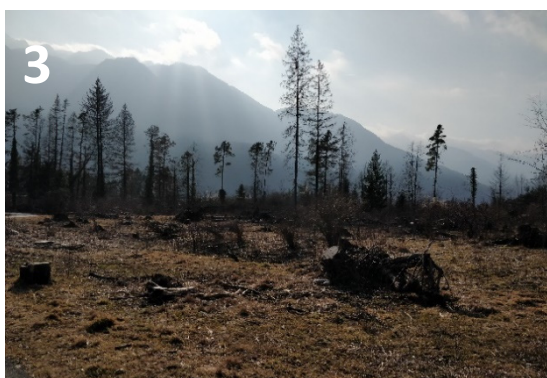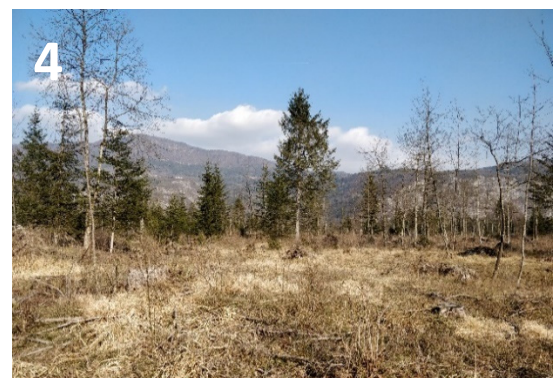

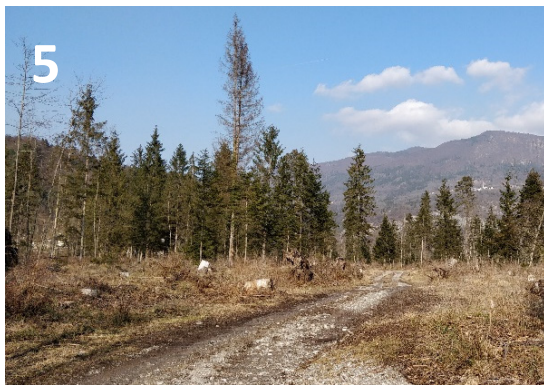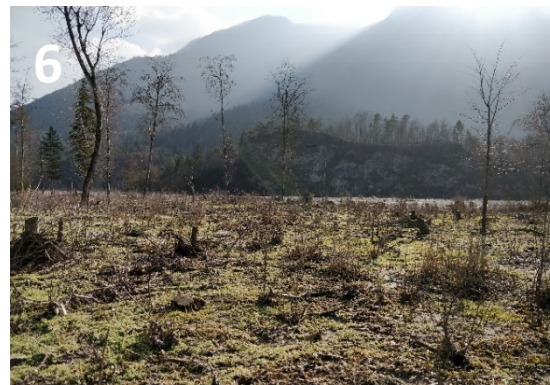

(a)

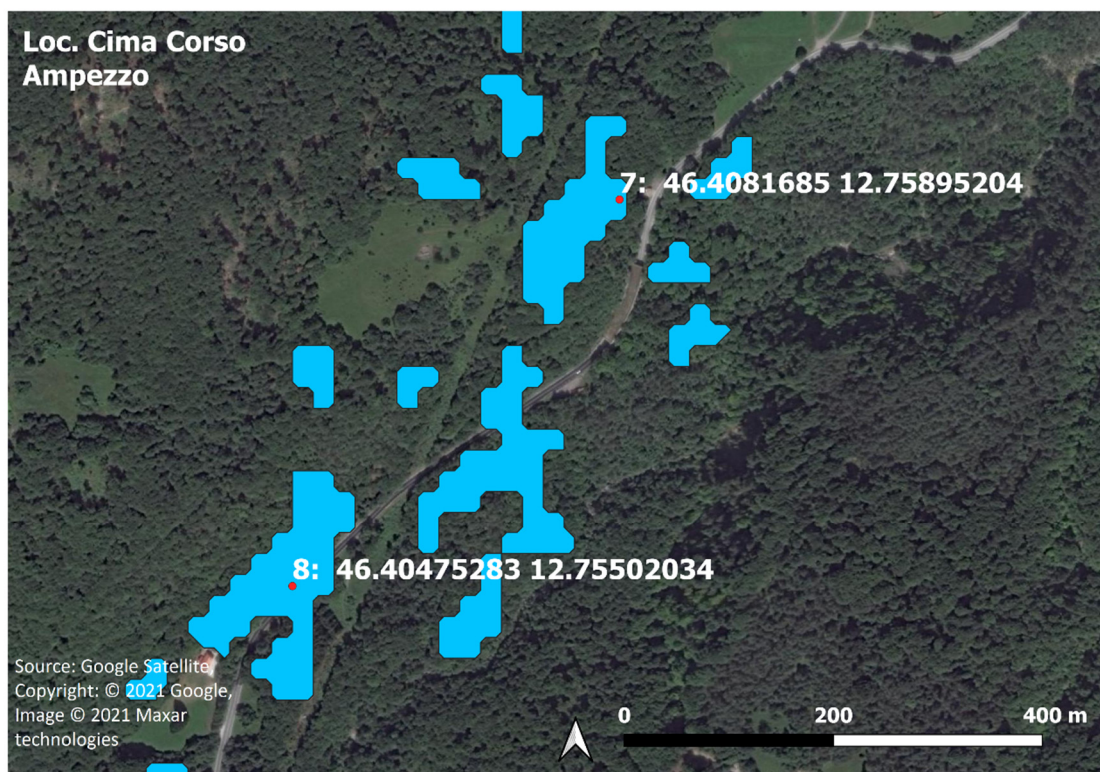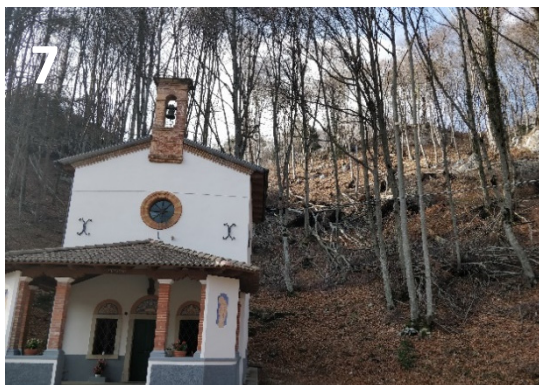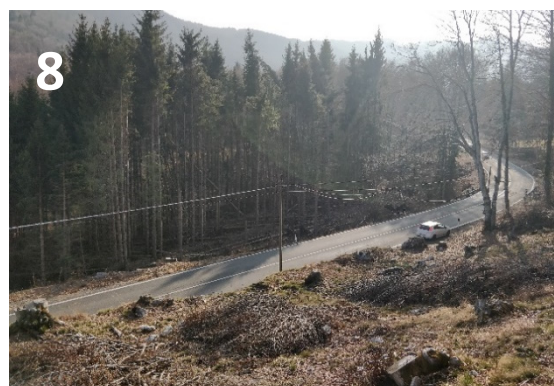

(b).

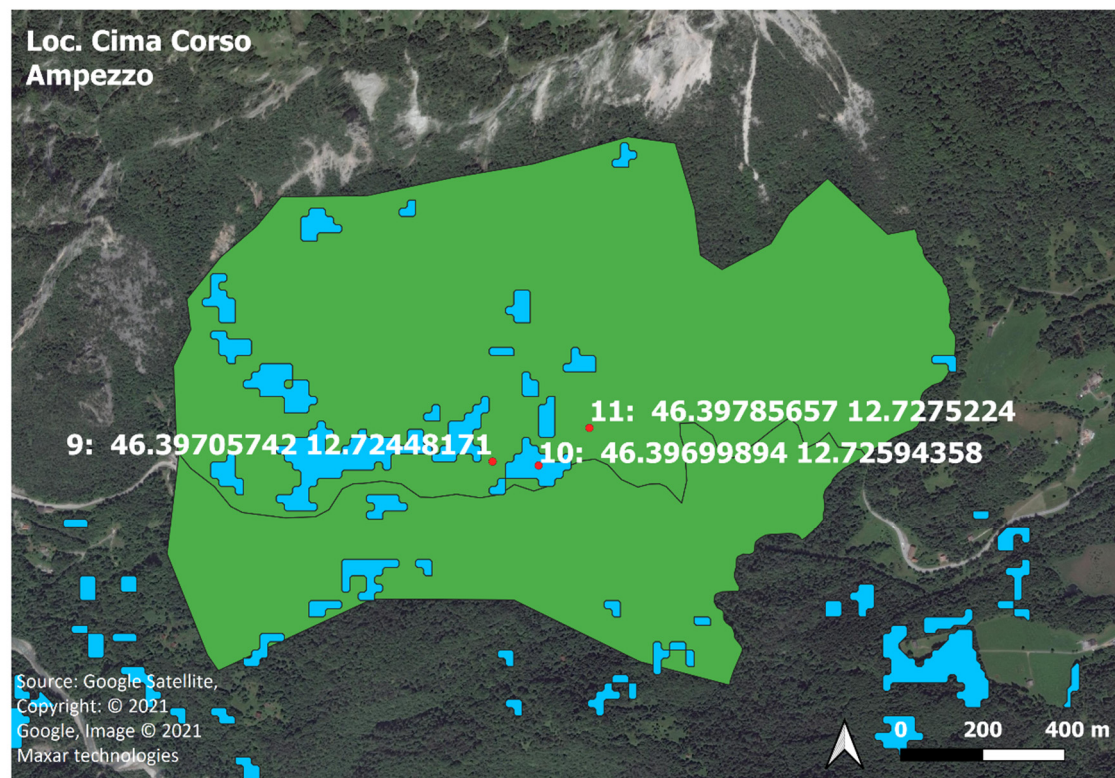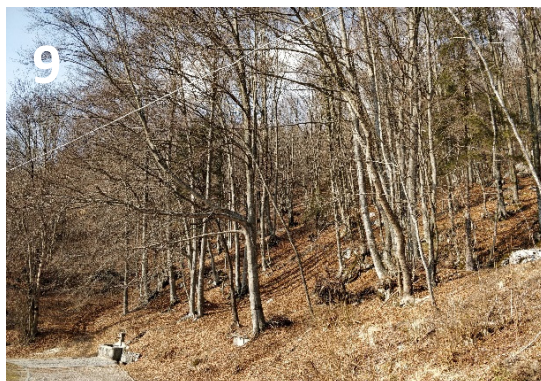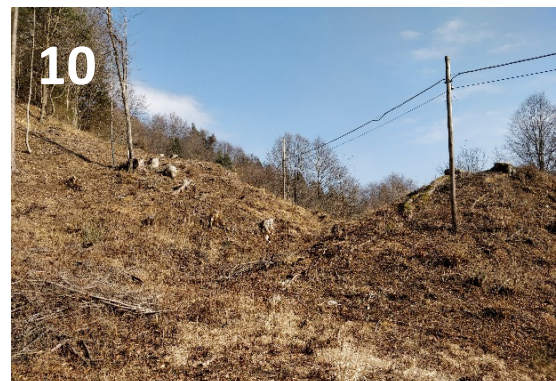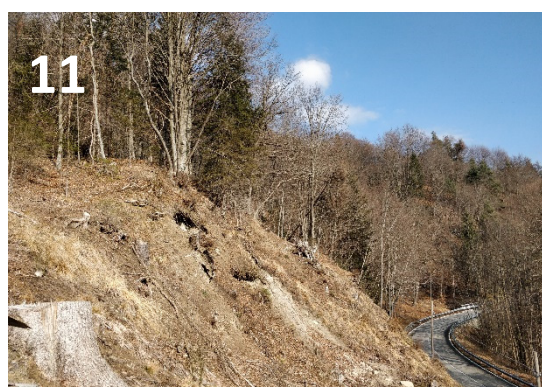

(c).

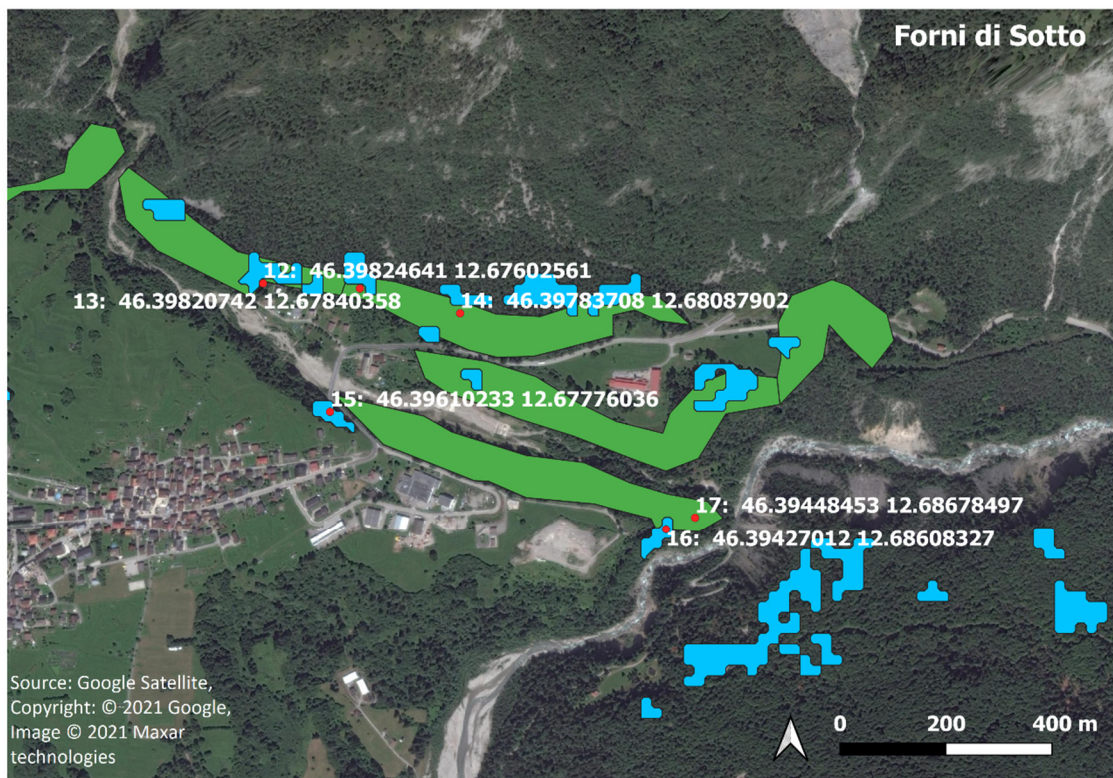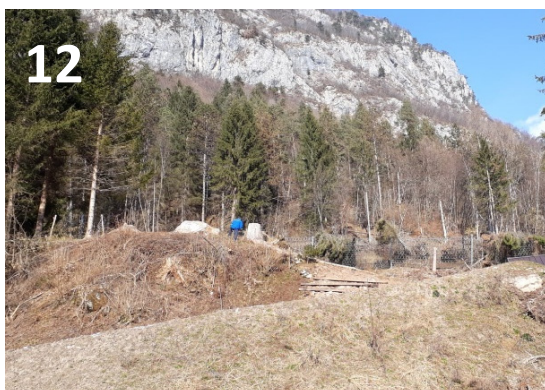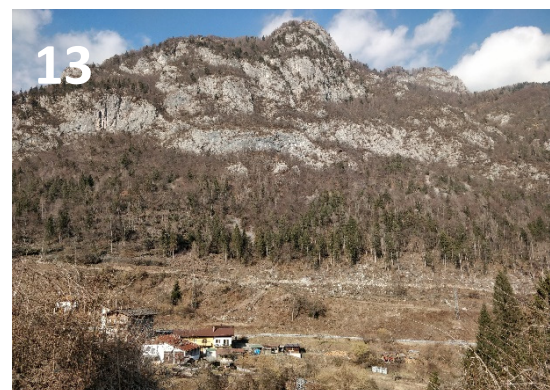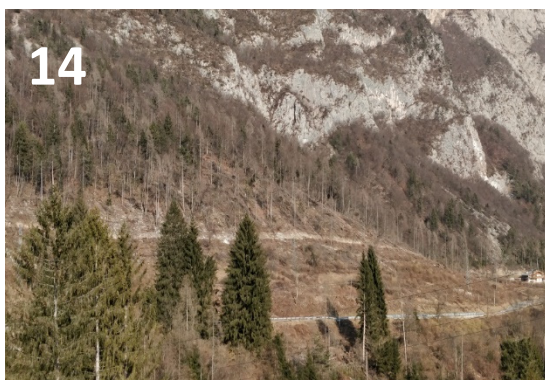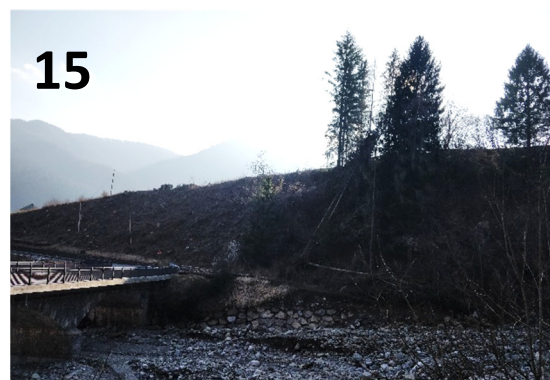

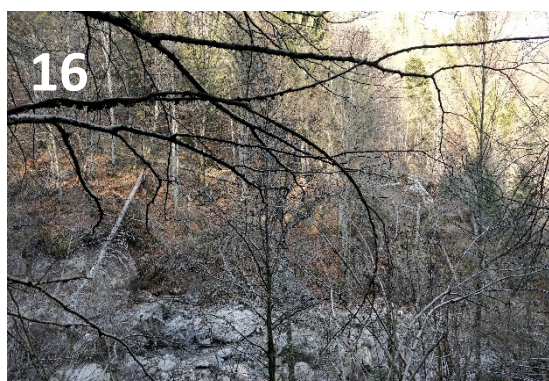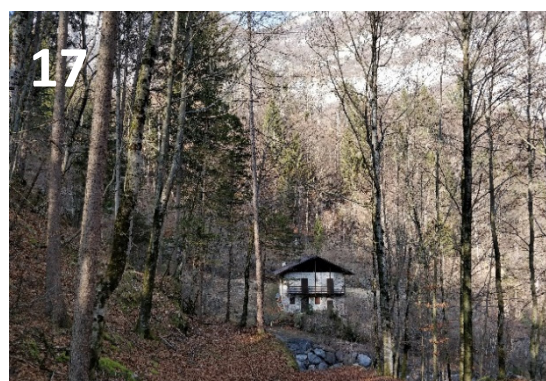

(d).

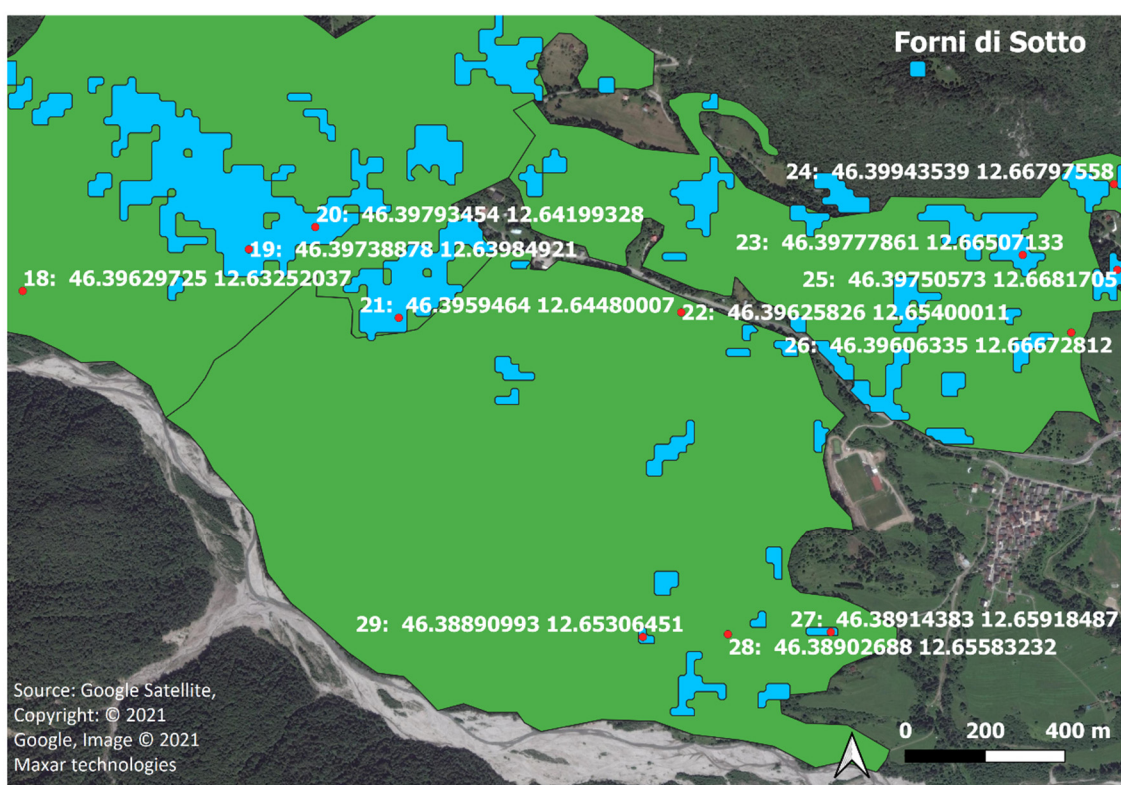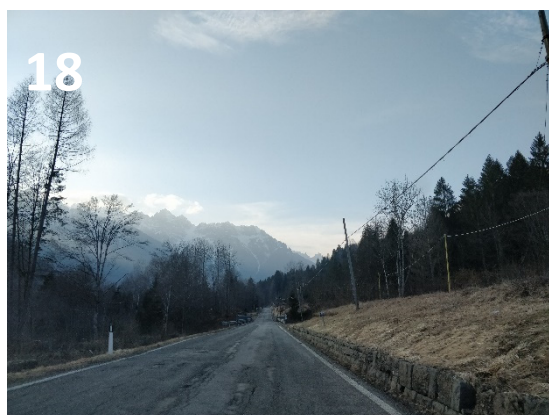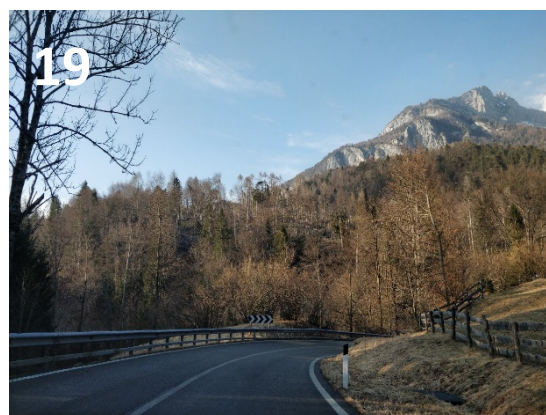

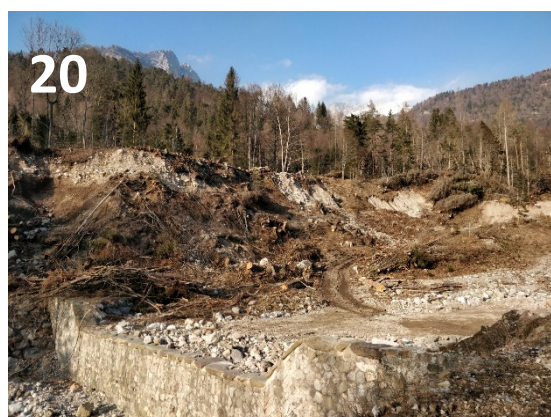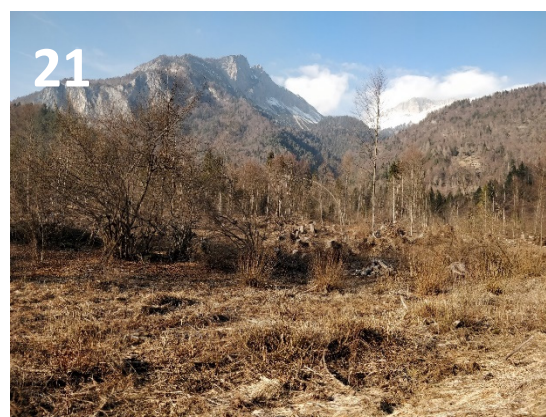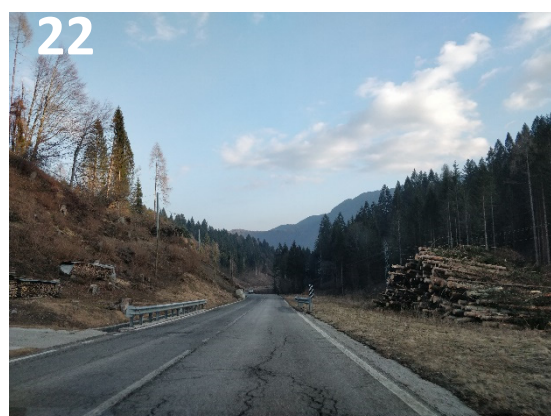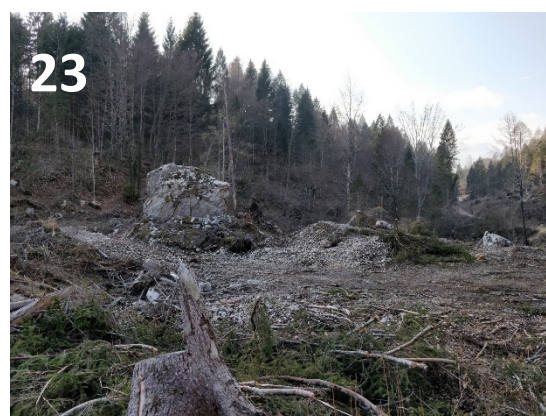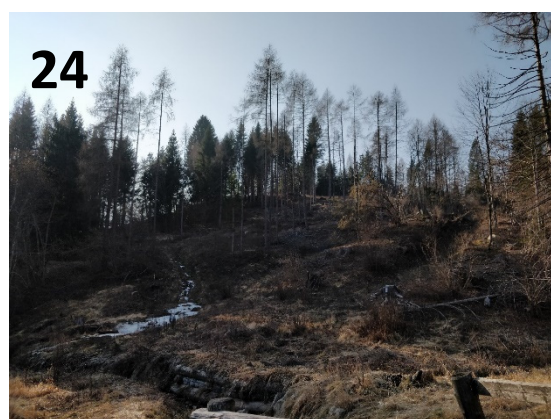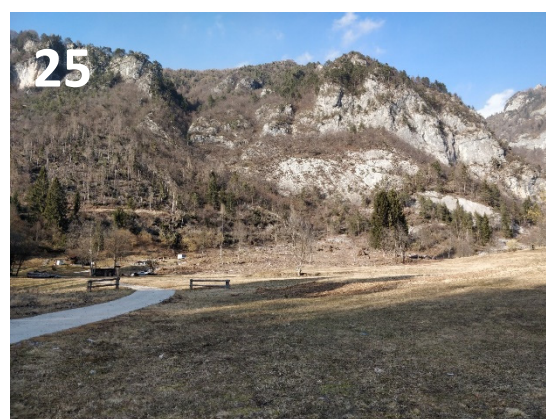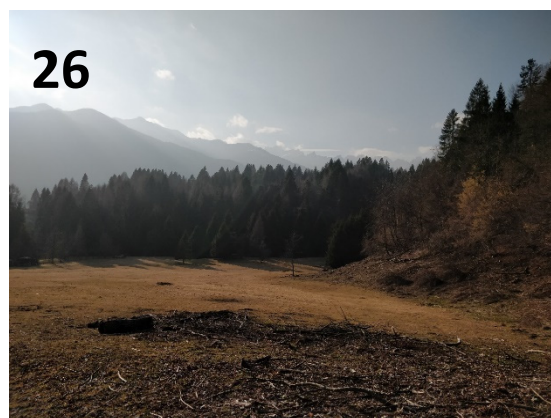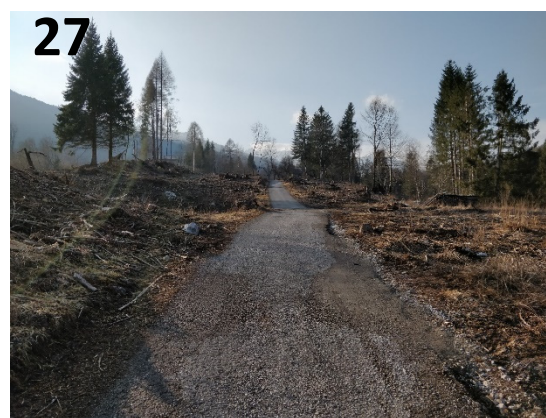

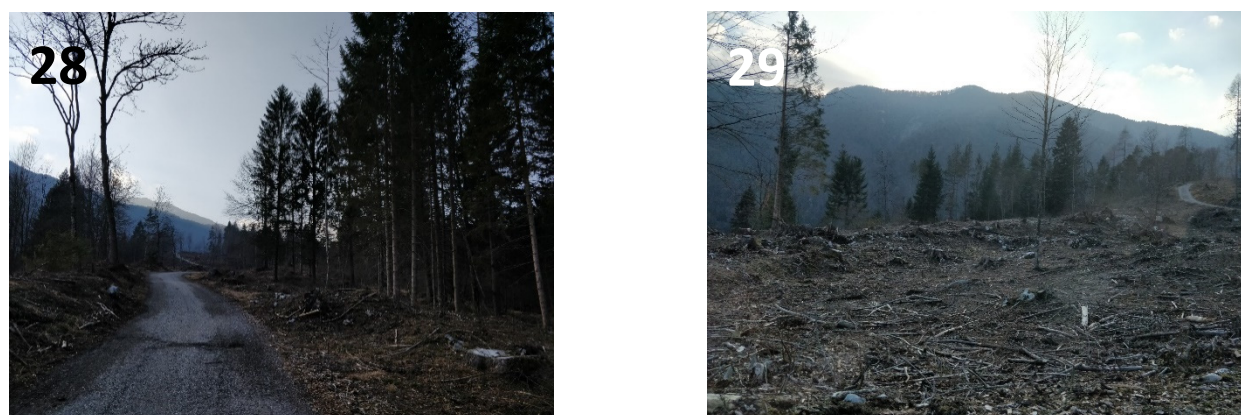

(e).

**Figure S7.** The images below show the areas visited during the field survey of the 1st of February 2020 in Tagliamento Valley, from the municipality of Villa Santina to Forni di Sotto, where, according to RFS, most damages were registered. Images points coordinates (in red) are provided in decimal degrees. Such areas include: (a) Villa Santina municipality, (b,c) Ampezzo and (d,e) Forni di Sotto. The Friuli Venezia Giulia windthrown areas, obtained through NDWI8A VID technique, are shown in blue while the ones provided by the Regional Forest Service (RFS) are in green.

**Table S1.** Outputs of Generalized Least Square models testing differences of NDWI8A, NDWI, NDVI, PSRI, SLAVI, GNDVI, IRECI and NDREDI indices values between study sites (L1, L2, C1, C2) for each of the dates (April 2017, October 2017, April 2018, October 2018, November 2018, March 2019, April 2019, July 2019, September 2019).

|        | Band       | Chisq     | Df | P-value    | Pseudo R <sup>2</sup> |
|--------|------------|-----------|----|------------|-----------------------|
| NDWI8A | Intercept  | 2358.880  | 1  | < 2.2e-16  | 0.940                 |
|        | Area       | 50.572    | 3  | 6.035 e-11 |                       |
|        | Date       | 175.376   | 8  | < 2.2e-16  |                       |
|        | Area* Date | 2695.089  | 24 | < 2.2e-16  |                       |
| NDWI   | Intercept  | 1835.389  | 1  | < 2.2e-16  | 0.901                 |
|        | Area       | 49.797    | 3  | 8.825 e-11 |                       |
|        | Date       | 122.762   | 8  | < 2.2e-16  |                       |
|        | Area* Date | 2292.141  | 24 | < 2.2e-16  |                       |
| NDVI   | Intercept  | 8156.732  | 1  | < 2.2e-16  | 0.887                 |
|        | Area       | 17.113    | 3  | 0.00067    |                       |
|        | Date       | 114.602   | 8  | < 2.2e-16  |                       |
|        | Area* Date | 2119.628  | 24 | < 2.2e-16  |                       |
| PSRI   | Intercept  | 28.7703   | 1  | 8.149 e-08 | 0.862                 |
|        | Area       | 3.7692    | 3  | 0.2875     |                       |
|        | Date       | 206.1174  | 8  | < 2.2e-16  |                       |
|        | Area* Date | 2421.4917 | 24 | < 2.2e-16  |                       |
| SLAVI  | Intercept  | 2158.899  | 1  | < 2.2e-16  | 0.885                 |
|        | Area       | 80.572    | 3  | < 2.2e-16  |                       |
|        | Date       | 557.458   | 8  | < 2.2e-16  |                       |
|        | Area* Date | 1203.149  | 24 | < 2.2e-16  |                       |
| GNDVI  | Intercept  | 21117.447 | 1  | < 2.2e-16  | 0.845                 |
|        | Area       | 48.702    | 3  | 1.51 e-10  |                       |
|        | Date       | 236.272   | 8  | < 2.2e-16  |                       |
|        | Area* Date | 1770.065  | 24 | < 2.2e-16  |                       |
| IRECI  | Intercept  | 230.59    | 1  | < 2.2e-16  | 0.759                 |
|        | Area       | 121.23    | 3  | < 2.2e-16  |                       |
|        | Date       | 1002.96   | 8  | < 2.2e-16  |                       |
|        | Area* Date | 1580.13   | 24 | < 2.2e-16  |                       |

|               |            |         |    |           |       |
|---------------|------------|---------|----|-----------|-------|
| <b>NDREDI</b> | Intercept  | 6042.00 | 1  | < 2.2e-16 | 0.660 |
|               | Area       | 181.30  | 3  | < 2.2e-16 |       |
|               | Date       | 1091.29 | 8  | < 2.2e-16 |       |
|               | Area* Date | 497.01  | 24 | < 2.2e-16 |       |

**Table S2.** Outputs of Generalized Least Square models testing differences of Sentinel-2 B02, B03, B04, B05, B06, B07, B08, B8A, B11, B12 values between study types (control vs windthrown) per each date after Vaia (October 2018, March 2019, April 2019, July 2019, September 2019).

|            | <b>Band</b>     | <b>Chisq</b> | <b>Df</b> | <b>P-value</b> | <b>Pseudo R<sup>2</sup></b> |
|------------|-----------------|--------------|-----------|----------------|-----------------------------|
| <b>B02</b> | Intercept       | 28.021       | 1         | 1.200e-07      | 0.825                       |
|            | Treatment       | 42.680       | 1         | 6.447e-11      |                             |
|            | Date            | 115.934      | 4         | < 2.2e-16      |                             |
|            | Treatment* Date | 218.069      | 4         | < 2.2e-16      |                             |
| <b>B03</b> | Intercept       | 169.450      | 1         | < 2e-16        | 0.803                       |
|            | Treatment       | 21.098       | 1         | 4.364 e-06     |                             |
|            | Date            | 68.009       | 4         | 5.972 e-14     |                             |
|            | Treatment* Date | 221.572      | 4         | < 2e-16        |                             |
| <b>B04</b> | Intercept       | 46.6449      | 1         | 8.509 e-12     | 0.781                       |
|            | Treatment       | 34.1556      | 1         | 5.088 e-09     |                             |
|            | Date            | 8.2756       | 4         | 0.08199        |                             |
|            | Treatment* Date | 163.5031     | 4         | < 2e-16        |                             |
| <b>B05</b> | Intercept       | 163.132      | 1         | < 2e-16        | 0.806                       |
|            | Treatment       | 24.793       | 1         | 6.382 e-07     |                             |
|            | Date            | 26.331       | 4         | 2.713 e-05     |                             |
|            | Treatment* Date | 129.901      | 4         | < 2e-16        |                             |
| <b>B06</b> | Intercept       | 403.925      | 1         | < 2e-16        | 0.573                       |
|            | Treatment       | 0.429        | 1         | 0.5125         |                             |
|            | Date            | 39.171       | 4         | 6.423 e-08     |                             |
|            | Treatment* Date | 38.799       | 4         | 7.665 e-08     |                             |
| <b>B07</b> | Intercept       | 489.0258     | 1         | < 2.2e-16      | 0.542                       |
|            | Treatment       | 0.9067       | 1         | 0.341          |                             |
|            | Date            | 44.5888      | 4         | 4.841 e-09     |                             |
|            | Treatment* Date | 27.8879      | 4         | 1.314 e-05     |                             |
| <b>B08</b> | Intercept       | 655.6683     | 1         | < 2.2e-1       | 0.455                       |
|            | Treatment       | 0.4409       | 1         | 0.5067         |                             |
|            | Date            | 41.3361      | 4         | 2.290 e-08     |                             |
|            | Treatment* Date | 33.7245      | 4         | 8.487 e-07     |                             |
| <b>B8A</b> | Intercept       | 543.0829     | 1         | < 2.2e-1       | 0.550                       |
|            | Treatment       | 0.0128       | 1         | 0.9099         |                             |
|            | Date            | 41.0014      | 4         | 2.686 e-08     |                             |
|            | Treatment* Date | 29.7851      | 4         | 5.413 e-06     |                             |
| <b>B11</b> | Intercept       | 47.310       | 1         | 6.060 e-12     | 0.825                       |
|            | Treatment       | 25.702       | 1         | 3.984 e-07     |                             |
|            | Date            | 19.494       | 4         | 0.0006283      |                             |
|            | Treatment* Date | 96.606       | 4         | < 2.2e-16      |                             |
| <b>B12</b> | Intercept       | 24.299       | 1         | 8.248 e-07     | 0.807                       |
|            | Treatment       | 25.057       | 1         | 5.566 e-07     |                             |
|            | Date            | 11.340       | 4         | 0.02299        |                             |
|            | Treatment* Date | 70.845       | 4         | 1.505 e-14     |                             |

**Table S3.** NDWI8A VID and RFS estimations in RFS delimited areas and NDWI8A VID % error as compared to RFS estimations for each municipality.

| Municipality          | RFS<br>Estimation ha | NDWI8A VID Estimation<br>ha | % Error      |
|-----------------------|----------------------|-----------------------------|--------------|
| Ampezzo               | 105.51               | 49.25                       | 36.35        |
| Arta Terme            | 23.43                | 4.98                        | 64.96        |
| Cervineto             | 34.85                | 8.64                        | 60.28        |
| Chiusaforte           | 8.21                 | 0.01                        | 99.82        |
| Comeglians            | 25.91                | 4.05                        | 72.97        |
| Enemonzo              | 11.41                | 0.12                        | 97.90        |
| Forni Avoltri         | 547.21               | 175.60                      | 51.41        |
| Forni di Sotto        | 691.18               | 55.68                       | 85.09        |
| Lauco                 | 33.77                | 2.01                        | 88.79        |
| Malborghetto Valbruna | 218.43               | 4.11                        | 96.31        |
| Moggio Udinese        | 31.14                | 1.87                        | 88.68        |
| Ovaro                 | 112.86               | 41.82                       | 45.93        |
| Paluzza               | 212.17               | 79.19                       | 45.64        |
| Paularo               | 138.71               | 20.29                       | 74.48        |
| Pontebba              | 51.51                | 13.78                       | 57.78        |
| Prato Carnico         | 87.16                | 14.34                       | 71.75        |
| Preone                | 12.16                | 1.72                        | 75.16        |
| Ravascletto           | 27.58                | 11.24                       | 42.11        |
| Resia                 | 9.43                 | 1.90                        | 66.44        |
| Rigolato              | 150.93               | 42.09                       | 56.39        |
| Sauris                | 32.58                | 13.03                       | 42.85        |
| Socchieve             | 19.33                | 6.46                        | 49.88        |
| Sutrio                | 180.29               | 69.44                       | 44.39        |
| Tarvisio              | 148.40               | 1.47                        | 98.04        |
| Tolmezzo              | 5.33                 | 8.33                        | 80.72        |
| Tramonti di Sopra     | 51.80                | 0.24                        | 91.49        |
| Treppo Ligosullo      | 6.40                 | 6.47                        | 77.79        |
| Venzone               | 54.06                | 4.48                        | 17.64        |
| Verzegnis             | 6.49                 | 12.49                       | 62.45        |
| Villa Santina         | 6.48                 | 0.11                        | 96.50        |
| Zuglio                | 41.69                | 6.04                        | 74.67        |
| <b>TOTAL</b>          | <b>3183.15</b>       | <b>661.26</b>               | <b>65.60</b> |
